# Supplementary material for: Hypoxia imaging in living cells, tissues and zebrafish with a nitroreductase-specific fluorescent probe
Source: Royal Society of Chemistry journal article supplement (doi:10.1039/d0an00378f), 2020-01-01
Supplement: d0an00378f1.pdf [file d0an00378f1.pdf]

## Electronic Supplementary Information for

### Hypoxia imaging in living cells, tissues and zebrafish with a nitroreductase-specific fluorescent probe

Li Fan<sup>a</sup>, Qi Zan<sup>a</sup>, Bo Lin<sup>b</sup>, Xiaodong Wang<sup>a</sup>, Xiaojuan Gong<sup>a</sup>, Zhonghua Zhao<sup>c</sup>,  
Shaomin Shuang<sup>d</sup>, Chuan Dong<sup>\*a</sup> and Man Shing Wong<sup>\*e</sup>

<sup>a</sup>*Institute of Environmental Science, Shanxi University, Taiyuan, 030006, P. R. China.*

<sup>b</sup>*Research Center for Analytical Sciences, Department of Chemistry, College of Sciences, Northeastern University, Shenyang, 110819, P. R. China.*

<sup>c</sup>*Department of Human Genetic Disease and Animal model, Institute of Biomedical Sciences, Shanxi University, Taiyuan, 030006, P. R. China.*

<sup>d</sup>*College of Chemistry and Chemical Engineering, Shanxi University, Taiyuan, 030006, P. R. China.*

<sup>e</sup>*Department of Chemistry and Institute of Molecular Functional Materials, Hong Kong Baptist University, Hong Kong SAR, P. R. China.*

**\*Corresponding author:**

[dc@sxu.edu.cn](mailto:dc@sxu.edu.cn); [mswong@hkbu.edu.hk](mailto:mswong@hkbu.edu.hk).

Fax: +86-531-7011011; Tel: +86-531-7011011

## **Contents:**

**Fig. S1**  $^1\text{H}$  NMR and  $^{13}\text{C}$  NMR spectra of compound 1 and NTNO.

**Fig. S2** HR-MS analysis of NTNO.

**Fig. S3** The pH effect on the fluorescence emission changes of NTNO (5  $\mu\text{M}$ ) in the absence and presence of NTR containing NADH in different pH PBS buffer, respectively

**Fig. S4** Cytotoxic effect of NTNO on HeLa cells

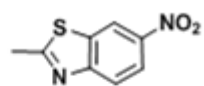

Compound 1

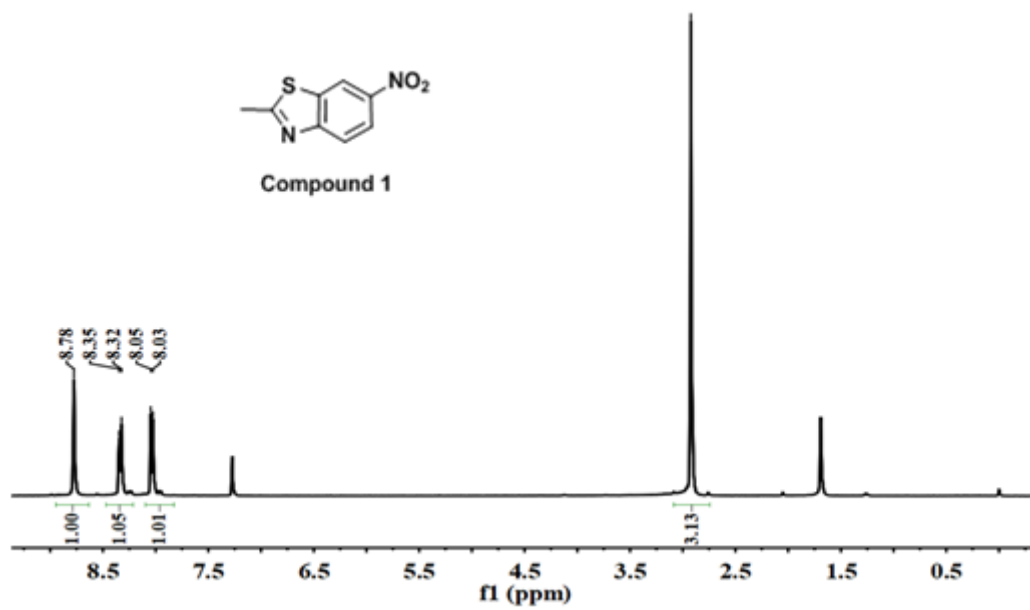

-10.06  
 -9.18  
 8.35  
 8.33  
 8.17  
 8.15  
 8.13  
 7.97  
 7.93  
 7.91  
 7.83  
 7.81  
 7.77  
 7.75  
 7.73  
 7.17  
 7.15  
 7.13

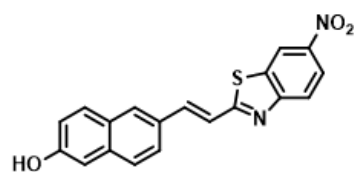

NTNO

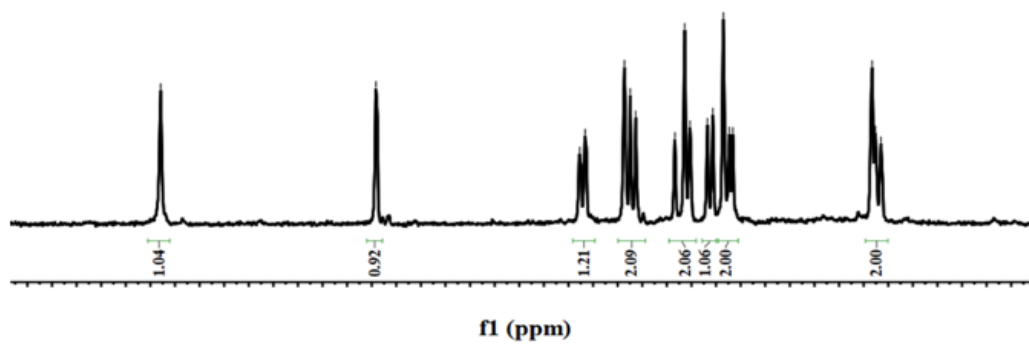

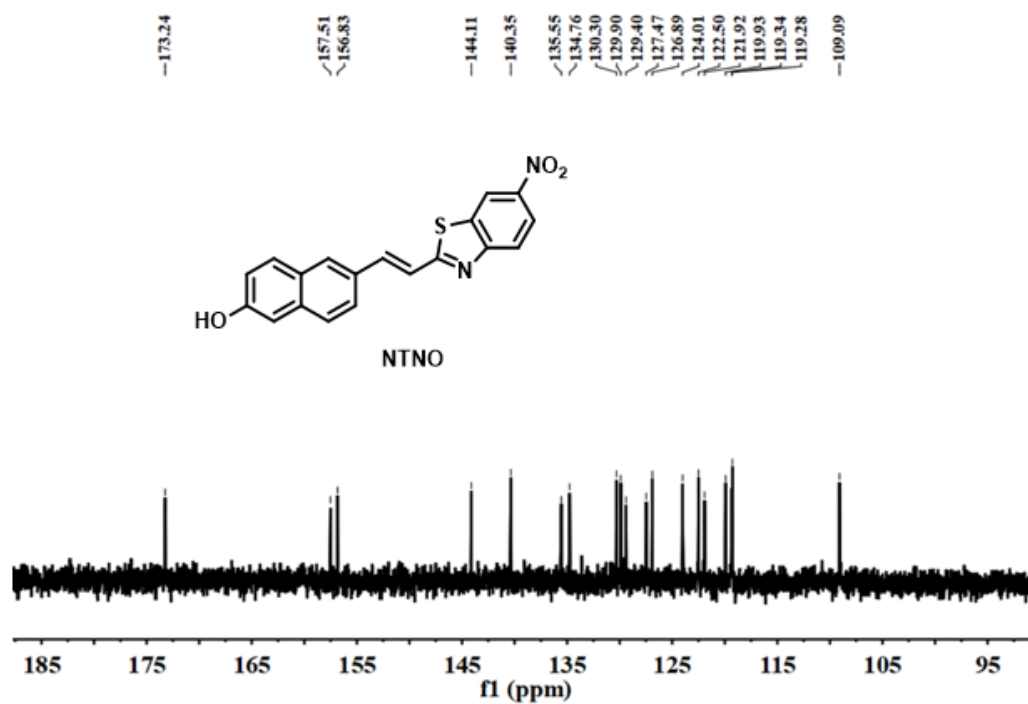

**Fig. S1** <sup>1</sup>H NMR, <sup>13</sup>C NMR spectra of compound **1** and NTNO.

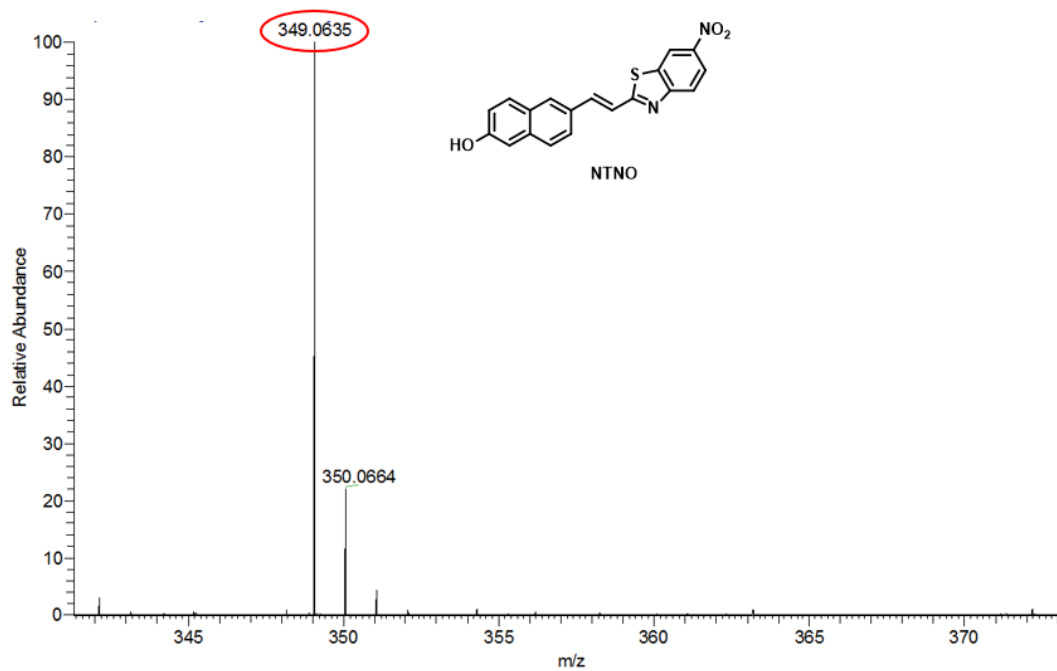

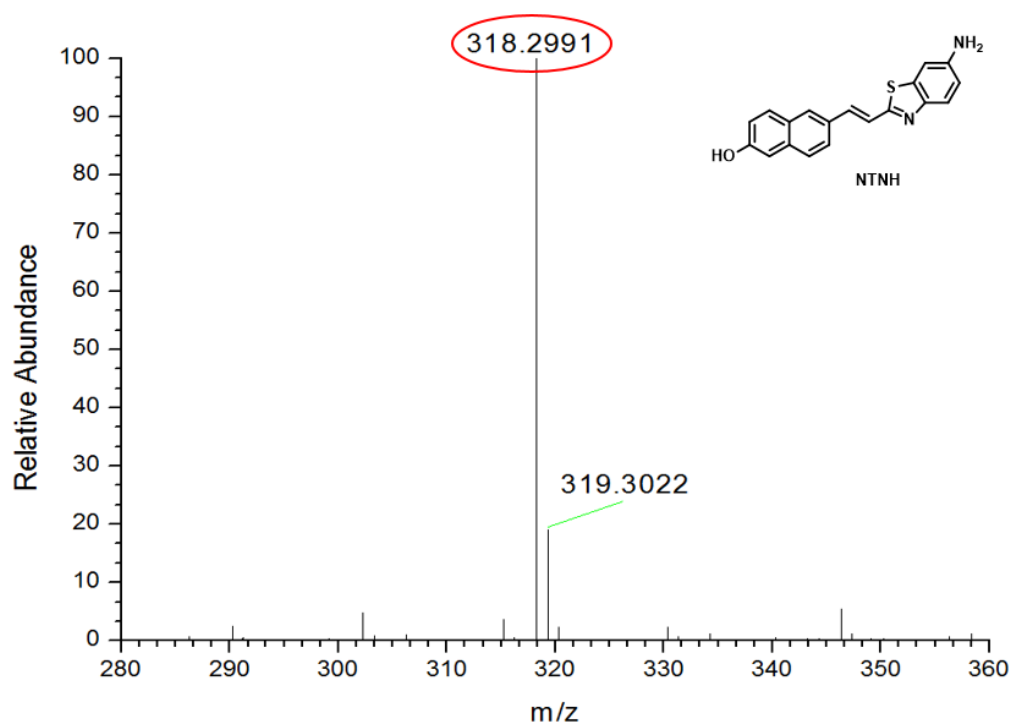

**Fig. S2** HR-MS analysis of  $[\text{NTNO}+\text{H}]^+$  and the reaction product ( $[\text{NTNH}+\text{H}]^+$ ) of 5  $\mu\text{M}$  NTNO with 10  $\mu\text{g/mL}$  NTR in the presence of 500  $\mu\text{M}$  NADH.

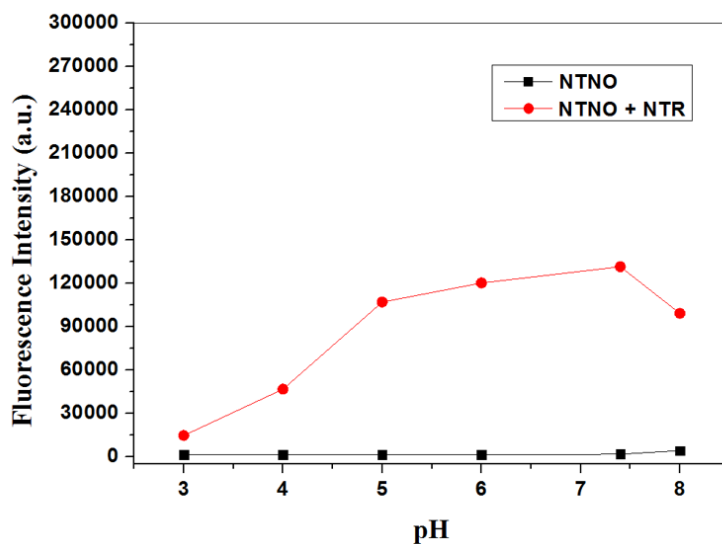

**Fig. S3** The pH effect on the fluorescence emission changes of NTNO (5  $\mu\text{M}$ ) in the absence and presence of NTR (5.0  $\mu\text{g/mL}$ ) containing NADH (500  $\mu\text{M}$ ) in different pH PBS buffer, respectively.

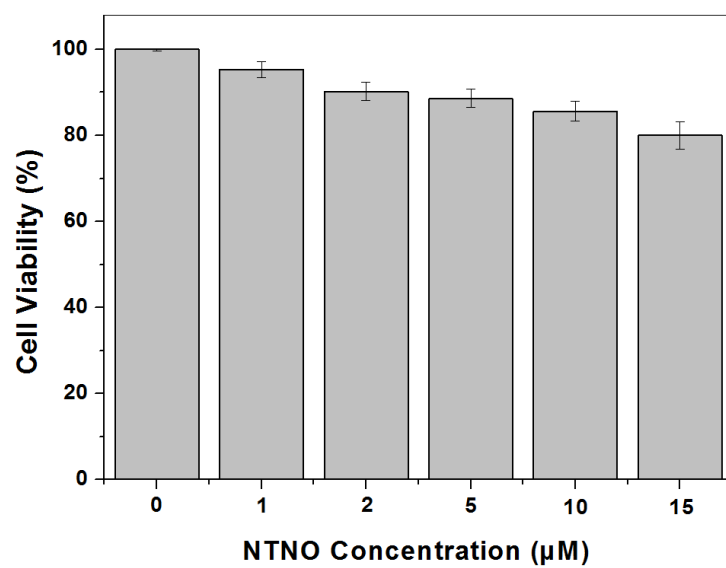

**Fig. S4** Cell viability of HeLa cells treated with different concentration of **NTNO** (0, 1, 2, 5, 10 and 15  $\mu\text{M}$ ) for 24 h in fresh medium.
